# Supplementary material for: Dopant ion concentration-dependent upconversion luminescence of cubic SrF2:Yb3+,Er3+ nanocrystals prepared by a fluorolytic sol–gel method
Source: Royal Society of Chemistry journal article supplement (doi:10.1039/d2nr02337g), 2022-01-01
Supplement: d2nr02337g1.pdf [file d2nr02337g1.pdf]

## Supplementary Information

### Dopant ion concentration-dependent upconversion luminescence of cubic SrF<sub>2</sub>:Yb<sup>3+</sup>,Er<sup>3+</sup> nanocrystals prepared by a fluorolytic Sol-Gel method

Melissa-Jane Monks, Christian Würth, Erhard Kemnitz and Ute Resch-Genger

#### A. SrF<sub>2</sub>:Yb,Er UCNC dispersions - Doping series

**Table S1.** Employed reactant amounts of precursor cations and methanolic HF for the preparation of 20 mL Sr<sub>1-(x+y)</sub>Yb<sub>x</sub>Er<sub>y</sub>F<sub>2+(x+y)</sub>-sol.

| Stoichiometry                                                              | Abbreviation | χ <sub>Yb</sub><br>[%] | χ <sub>Er</sub><br>[%] | n <sub>Sr</sub><br>[mmol] | n <sub>Yb</sub><br>[mmol] | n <sub>Er</sub><br>[mmol] | n <sub>HF</sub><br>[mmol] |
|----------------------------------------------------------------------------|--------------|------------------------|------------------------|---------------------------|---------------------------|---------------------------|---------------------------|
| Sr <sub>0.94</sub> Yb <sub>0.05</sub> Er <sub>0.01</sub> F <sub>2.06</sub> | <b>5-1</b>   | 5                      | 1                      | 3.76                      | 0.2                       | 0.04                      | 8.32                      |
| Sr <sub>0.89</sub> Yb <sub>0.10</sub> Er <sub>0.01</sub> F <sub>2.11</sub> | <b>10-1</b>  | 10                     | 1                      | 3.56                      | 0.4                       | 0.04                      | 8.51                      |
| Sr <sub>0.84</sub> Yb <sub>0.15</sub> Er <sub>0.01</sub> F <sub>2.16</sub> | <b>15-1</b>  | 15                     | 1                      | 3.36                      | 0.6                       | 0.04                      | 8.71                      |
| Sr <sub>0.74</sub> Yb <sub>0.20</sub> Er <sub>0.01</sub> F <sub>2.21</sub> | <b>20-1</b>  | 20                     | 1                      | 3.16                      | 0.8                       | 0.04                      | 8.9                       |
| Sr <sub>0.93</sub> Yb <sub>0.05</sub> Er <sub>0.02</sub> F <sub>2.07</sub> | <b>5-2</b>   | 5                      | 2                      | 3.72                      | 0.2                       | 0.08                      | 8.32                      |
| Sr <sub>0.88</sub> Yb <sub>0.10</sub> Er <sub>0.02</sub> F <sub>2.12</sub> | <b>10-2</b>  | 10                     | 2                      | 3.52                      | 0.4                       | 0.08                      | 8.51                      |
| Sr <sub>0.83</sub> Yb <sub>0.15</sub> Er <sub>0.02</sub> F <sub>2.17</sub> | <b>15-2</b>  | 15                     | 2                      | 3.32                      | 0.6                       | 0.08                      | 8.71                      |
| Sr <sub>0.78</sub> Yb <sub>0.20</sub> Er <sub>0.02</sub> F <sub>2.22</sub> | <b>20-2</b>  | 20                     | 2                      | 3.12                      | 0.8                       | 0.08                      | 8.9                       |
| Sr <sub>0.92</sub> Yb <sub>0.05</sub> Er <sub>0.03</sub> F <sub>2.08</sub> | <b>5-3</b>   | 5                      | 3                      | 3.68                      | 0.2                       | 0.12                      | 8.32                      |
| Sr <sub>0.87</sub> Yb <sub>0.10</sub> Er <sub>0.03</sub> F <sub>2.13</sub> | <b>10-3</b>  | 10                     | 3                      | 3.48                      | 0.4                       | 0.12                      | 8.51                      |
| Sr <sub>0.83</sub> Yb <sub>0.15</sub> Er <sub>0.03</sub> F <sub>2.18</sub> | <b>15-3</b>  | 15                     | 3                      | 3.28                      | 0.6                       | 0.12                      | 8.71                      |
| Sr <sub>0.77</sub> Yb <sub>0.20</sub> Er <sub>0.03</sub> F <sub>2.23</sub> | <b>20-3</b>  | 20                     | 3                      | 3.08                      | 0.8                       | 0.12                      | 8.9                       |

**Table S2:** Yb<sup>3+</sup>, Er<sup>3+</sup> and Sr<sup>3+</sup> amounts (χ<sub>Yb</sub>, χ<sub>Er</sub>, χ<sub>Sr</sub>) determined by ICP-OES of series χ<sub>Er</sub> = 1 % and χ<sub>Er</sub> = 2 %. The ratios were met with small deviations. Sample 10-1 shows the highest deviation with χ<sub>Yb</sub> = 13.5 % instead of χ<sub>Yb</sub> = 10 %.

| sample      | χ <sub>Yb</sub> | χ <sub>Er</sub> | χ <sub>Sr</sub> |
|-------------|-----------------|-----------------|-----------------|
| <b>5-1</b>  | 5.4             | 1.0             | 93.6            |
| <b>10-1</b> | 13.5            | 1.3             | 85.2            |
| <b>15-1</b> | 15.0            | 1.0             | 84.0            |
| <b>20-1</b> | 20.9            | 1.0             | 78.1            |
| <b>5-2</b>  | 5.2             | 1.9             | 92.9            |
| <b>10-2</b> | 9.7             | 1.8             | 88.5            |
| <b>15-2</b> | 14.4            | 1.8             | 83.9            |
| <b>20-2</b> | 19.3            | 1.8             | 78.9            |

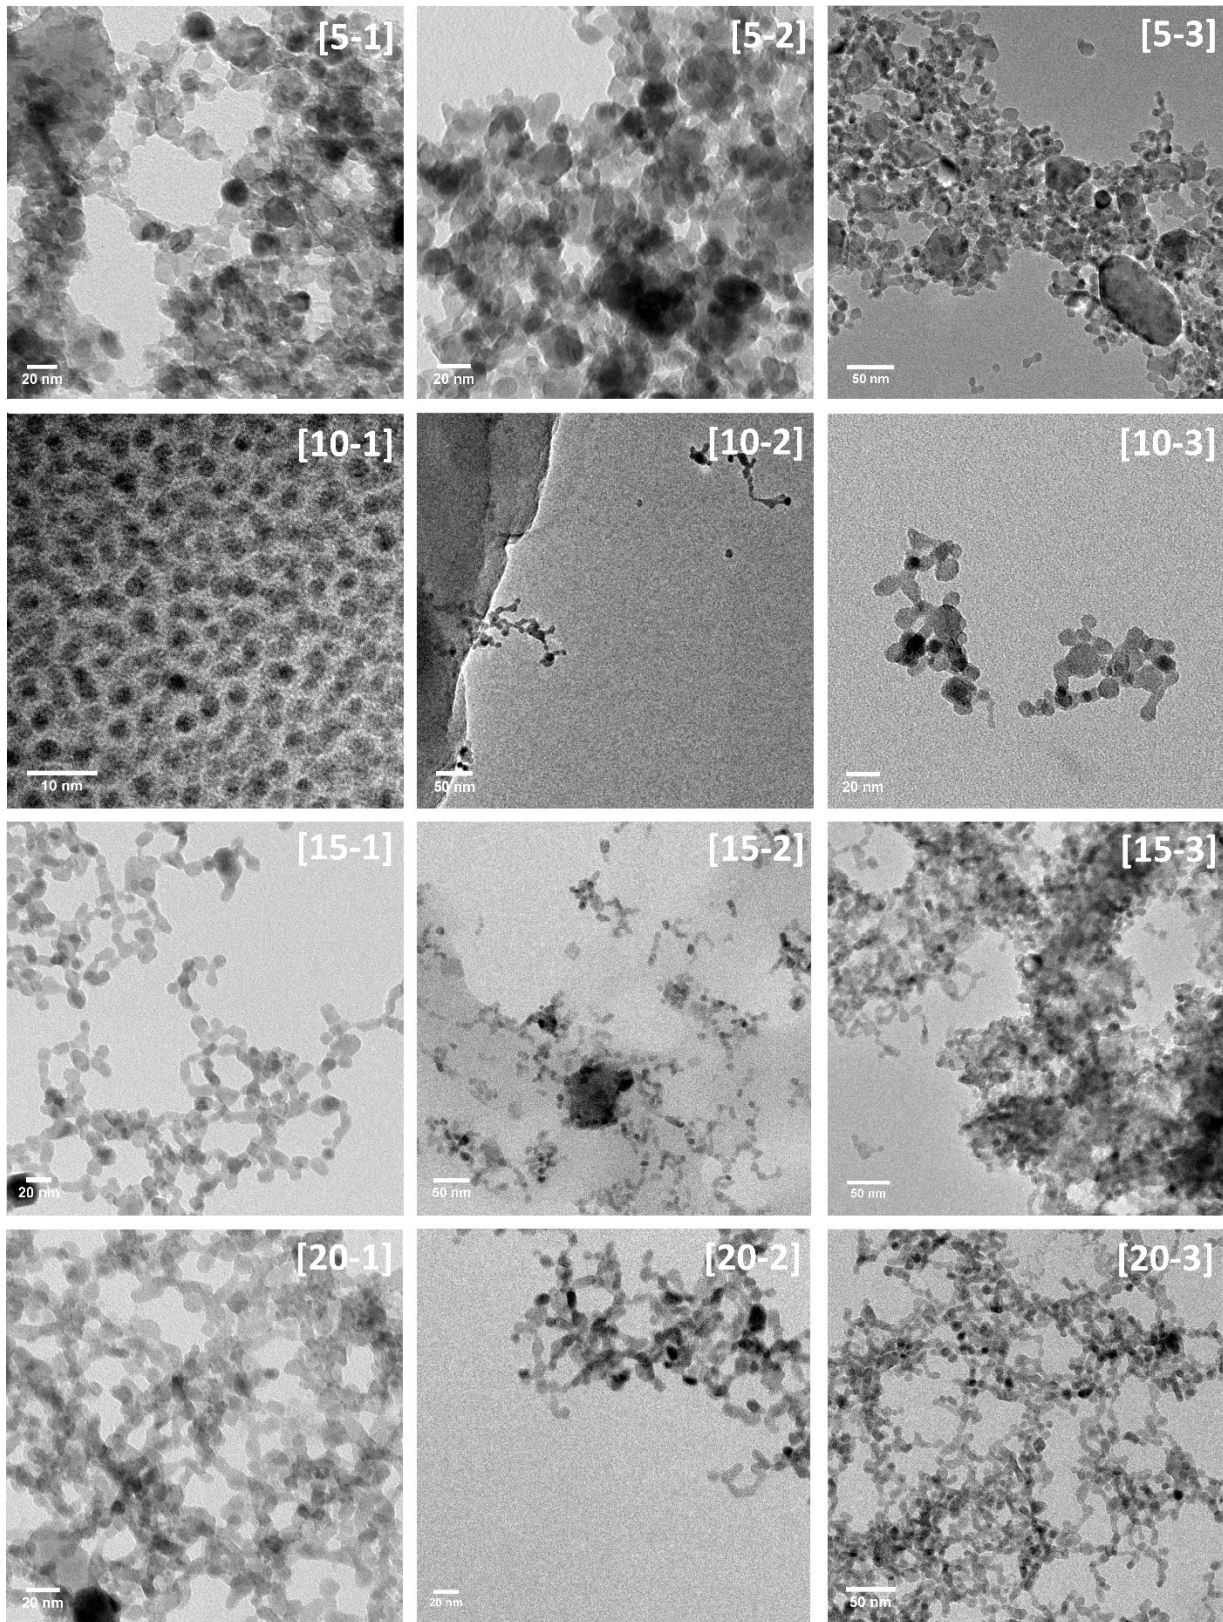

**Figure S3:** TEM images of SrF<sub>2</sub>:Yb,Er UCNC dispersions of the doping series. Er<sup>3+</sup>-amount ( $\chi_{Er}$ ) left to right 1 %, 2 %, 3 %; Yb<sup>3+</sup>-amount ( $\chi_{Yb}$ ) top to bottom 5 %, 10 %, 15 %, 20 %.

**Table S4:** Integration intervals of electronic transitions.

| notation | Electronic | Integration interval |
|----------|------------|----------------------|
|----------|------------|----------------------|

|                 | transition                              | [nm]          |
|-----------------|-----------------------------------------|---------------|
| <b>blue</b>     | ${}^2H_{9/2} \rightarrow {}^4I_{15/2}$  | 394.0 – 430.0 |
| <b>green</b>    | ${}^2H_{11/2} \rightarrow {}^4I_{15/2}$ | 507.0 – 533.6 |
|                 | ${}^4S_{3/2} \rightarrow {}^4I_{15/2}$  | 533.6 – 580.0 |
| <b>Red</b>      | ${}^4F_{9/2} \rightarrow {}^4I_{15/2}$  | 630.0 – 685.0 |
| <b>NIR1</b>     | ${}^4I_{9/2} \rightarrow {}^4I_{15/2}$  | 780.0 – 833.0 |
| <b>NIR2</b>     | ${}^4S_{3/2} \rightarrow {}^4I_{13/2}$  | 833.0 – 880.0 |
| <i>total UC</i> |                                         | 394.0 – 880.0 |

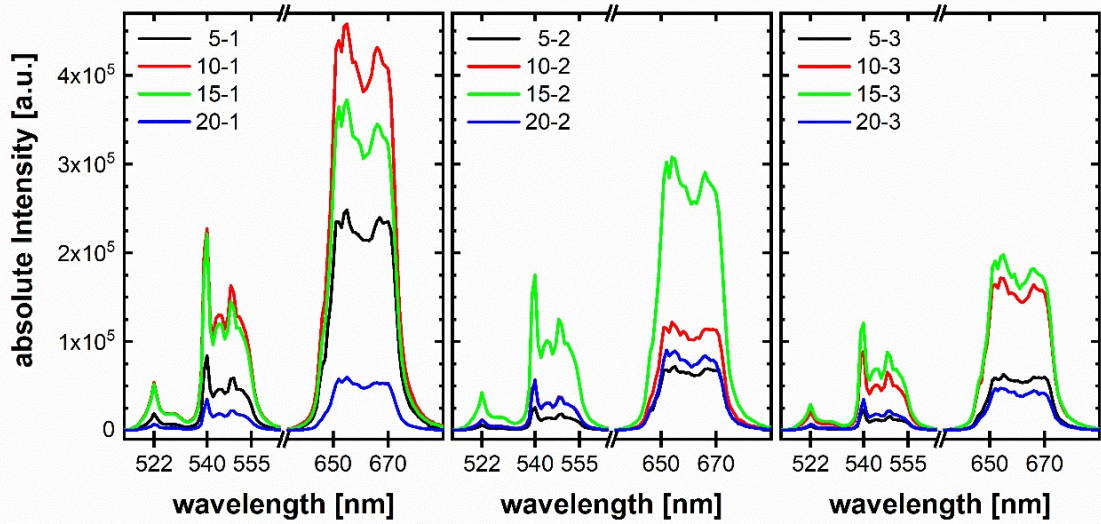

**Figure S5:** Absolutely measured UCL spectra of the green- and red-emitting transition ( ${}^2H_{11/2}$ ,  ${}^4S_{3/2} \rightarrow {}^4I_{15/2}$ , and  ${}^4F_{9/2} \rightarrow {}^4I_{15/2}$ ) at the varied doping amounts. For clarity, the spectra are divided into three groups according to the  $Er^{3+}$ -amount ( $\chi_{Er}$ ). The most evident result is the much higher total UCL intensity at particularly low  $\chi_{Er}$  of 1%. An increase in  $\chi_{Er}$  to 2 % and 3 % yields gradually lower intensity.

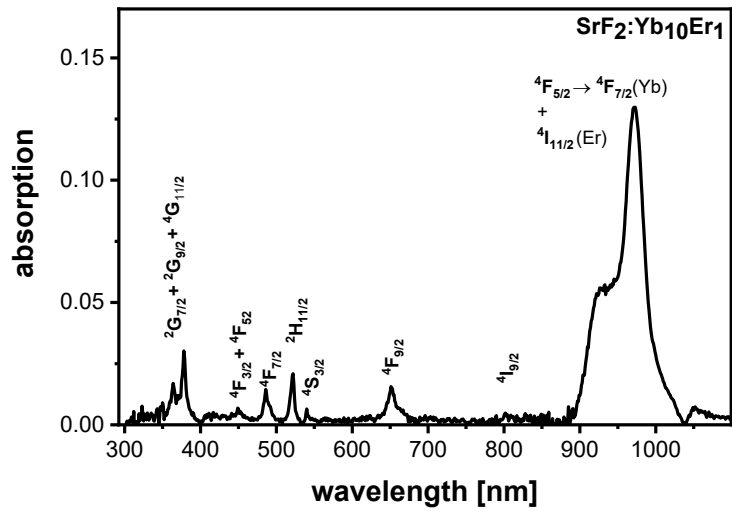

**Figure S6:** Absorption spectrum of SrF<sub>2</sub>:Yb<sub>10</sub>Er<sub>1</sub> powder obtained via reflectance/transmission measurements.

### Calculation of relative brightness

The nanocrystal brightness ( $B_{UCNC}$ ) is the Brightness of an individual UCNC.  $B_{UCNC}$  is calculated from the product of the UCL quantum yield ( $\Phi_{UCL}$ ), the absorption cross section of the sensitizer ( $\sigma_{Yb}$ ) and the number of sensitizer species within an average UCNC ( $N_{Yb,UCNC}$ ).  $N_{Yb,UCNC}$  can be calculated from the product of the number of unit cells ( $N_{unit}$ ) within a single UCNC and the fraction of cells containing a sensitizer ion (sensitizer doping amount,  $\chi_{Yb}$ ). The number of unit cells is the fraction of the volume ( $V_{UCNC}$ ) of an individual UCNC and the volume of a unit cell ( $V_{unit}$ ). For comparing of the resulting values we use the relative brightness ( $B_{rel}$ ) which is the quotient of  $B_{UCNC}$  to the brightness of the best performing UCNC ( $B_{UCNC,max}^*$ ). Using eq. S1, eq. S2 and eq. S3, eq. S4 can be derived which was used for calculation of  $B_{rel}$ .

$$B_{UCNC} = \Phi_{UCL} \cdot \sigma_{Yb} \cdot N_{Yb,UCNC} \quad \text{eq. S1}$$

$$N_{Yb,UCNC} = N_{unit} \cdot \chi_{Yb} = \frac{V_{UCNC}}{V_{unit}} \cdot \chi_{Yb} \quad \text{eq. S2}$$

$$B_{rel} = \frac{B_{UCNC}}{B_{UCNC,max}^*} \quad \text{eq. S3}$$

$$B_{rel} = \frac{\Phi_{UCL} V_{UCNC} \cdot \chi_{Yb}}{\Phi_{UCL}^* V_{UCNC}^* \cdot \chi_{Yb}^*} \quad \text{eq. S4}$$

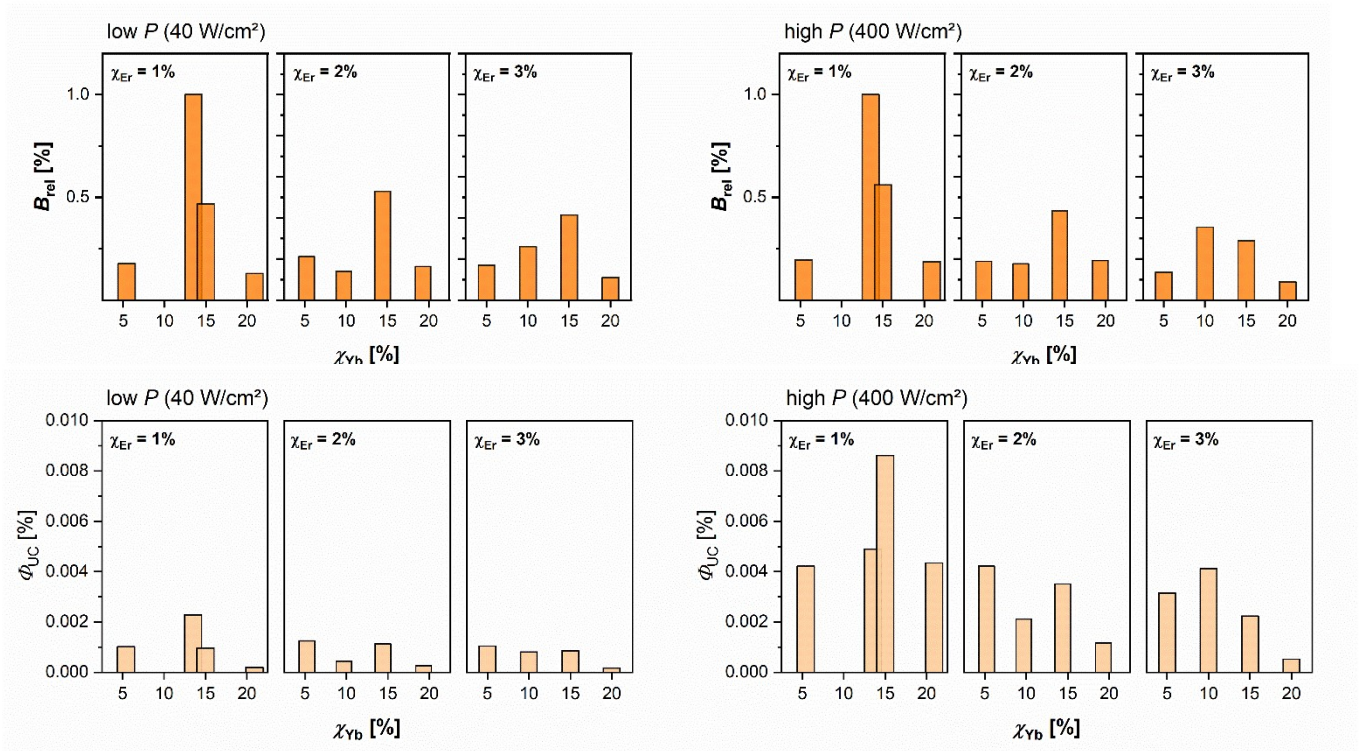

**Figure S7:** Relative brightness (top) and upconversion quantum yield ( $\Phi_{UC}$ ) determined for low and high excitation power density (low  $P = 40 \text{ W/cm}^2$ , high  $P = 400 \text{ W/cm}^2$ ); of  $\text{SrF}_2:\text{Yb,Er}$  UCNC dispersions in ethylene glycol ( $\lambda_{ex} = 980 \text{ nm}$ ) at varied  $\chi_{Er}$  (1 %, 2 %, 3 %) and  $\chi_{Yb}$  (5 %, 10 %, 15 %, 20 %)

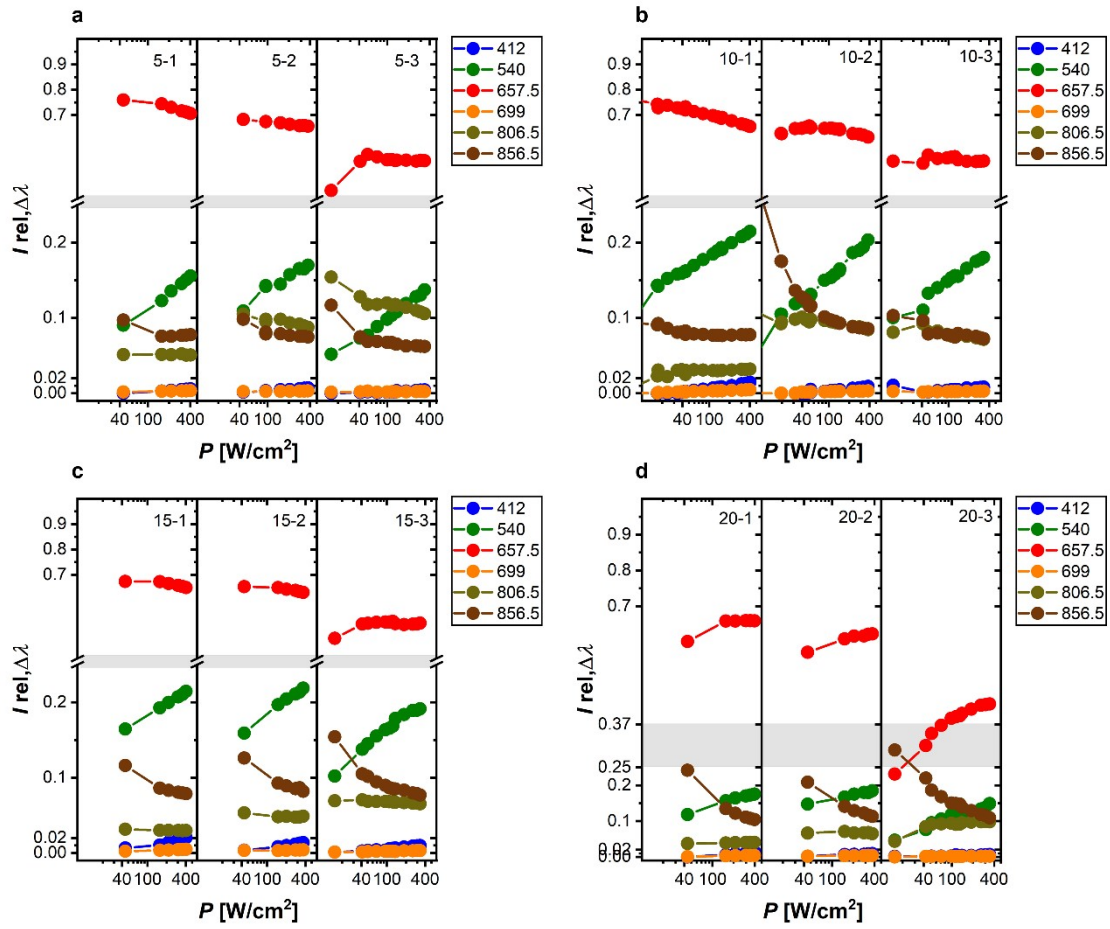

**Figure S8:**  $P$ -dependent relative spectral UCL distribution ( $I_{rel,\Delta\lambda}(P)$ ) of SrF<sub>2</sub>:Yb<sub>x</sub>Er<sub>γ</sub> UCNC dispersions in ethylene glycol ( $\lambda_{ex}=980$  nm) at varied  $\chi_{Yb}$  (5 %, 10 %, 15 %, 20 %) and  $\chi_{Er}$  (1 %, 2 % and 3 %). Grouped by Yb<sup>3+</sup> amount **(a)**  $\chi_{Yb} = 5\%$  **(b)**  $\chi_{Yb} = 10\%$  **(c)**  $\chi_{Yb} = 15\%$  **(d)**  $\chi_{Yb} = 20\%$ ; The panels in each figure  $\chi_{Er}$  from left to right: 1 %, 2 % and 3 %.

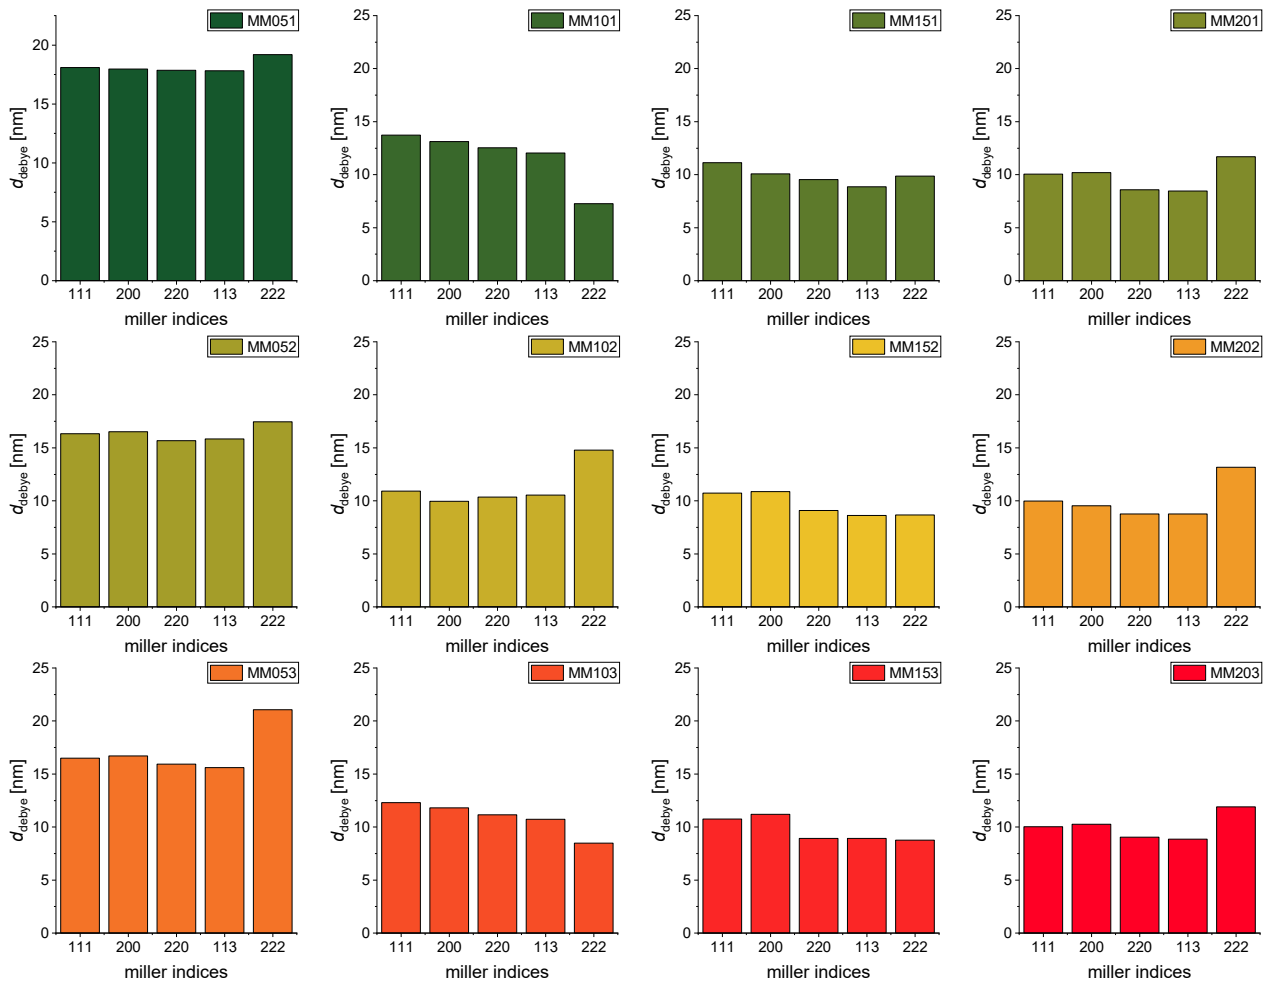

**Figure S9:** Crystallite size obtained by the *Debye-Scherrer* equation: values mentioned in the text are mean values of the crystallite sizes calculated of 5 different lattice planes [(111), (200), (220), (113), (222)].

## B. SrF<sub>2</sub>:Yb,Er UCNC Xerogels - Calcination series

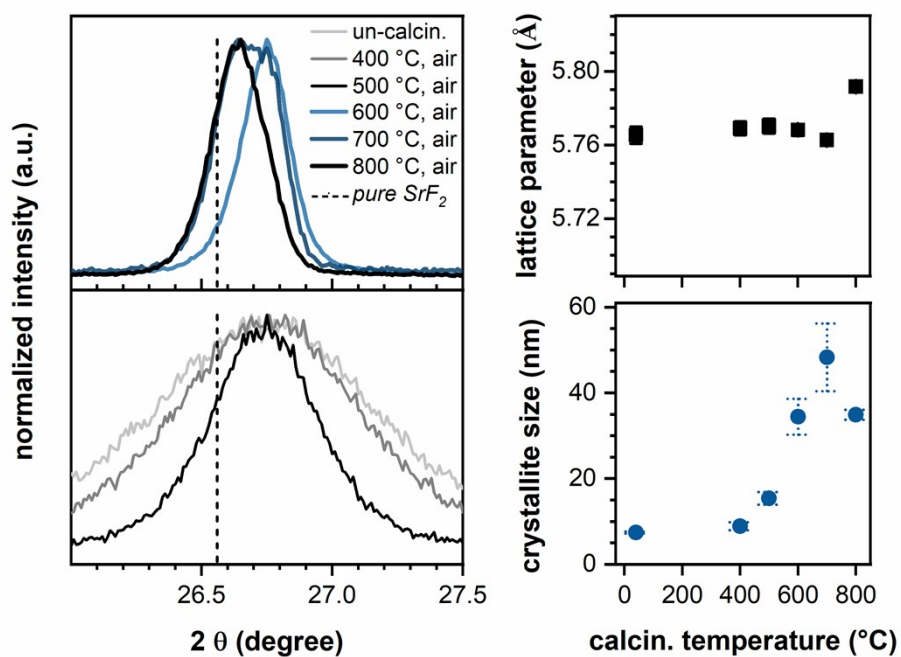

**Figure S10:** (111) reflection at 26.7° (left); lattice parameter (right, top), crystallite size (right, bottom) of calcinated UCNC powders.

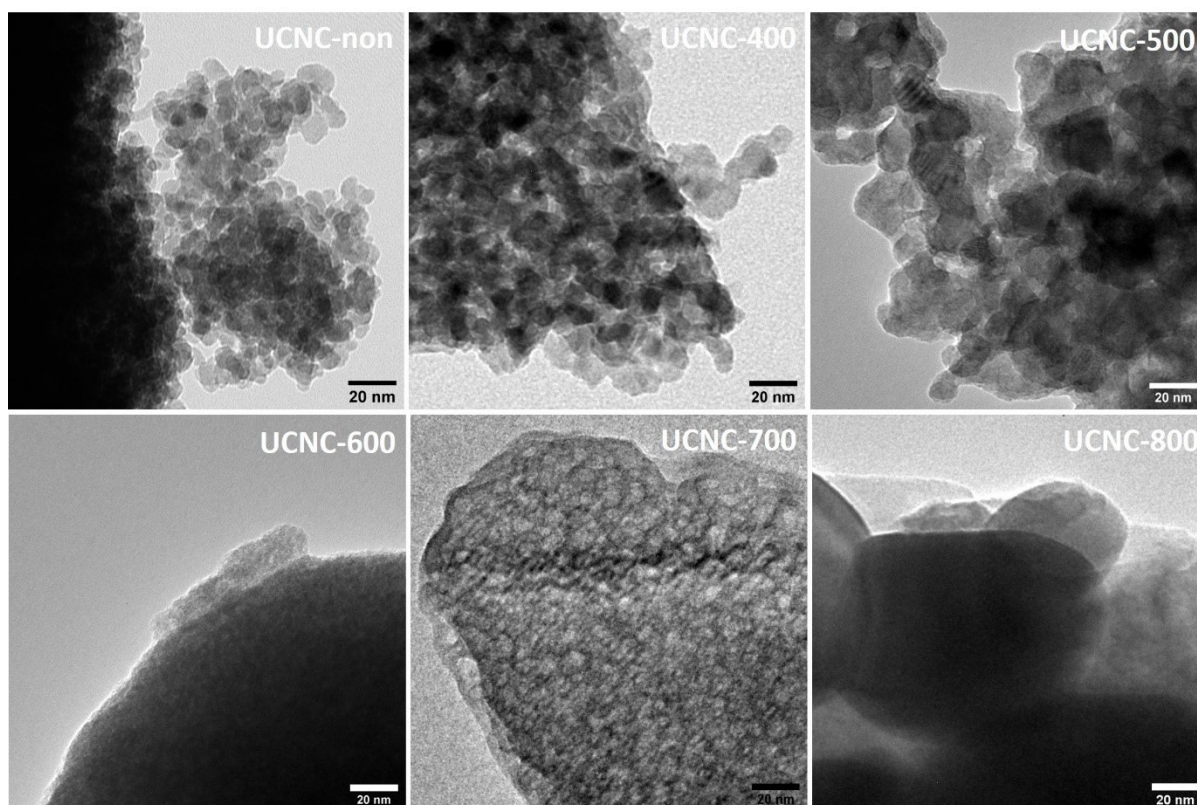

**Figure S11:** TEM images of UCNC xerogels calcinated at different temperatures (UCNC-non, UCNC-400, UCNC-500, UCNC-600, UCNC-700, UCNC-800).



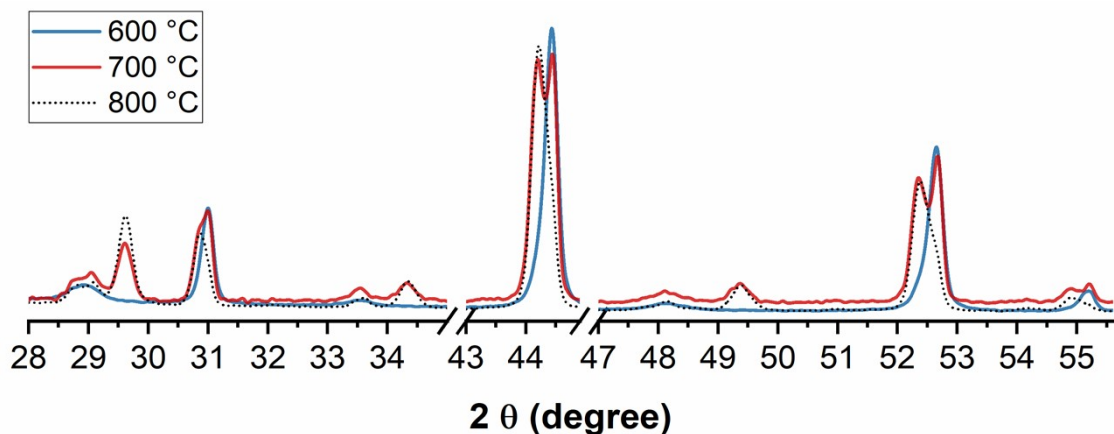

**Figure S12:** XRD-pattern of UCNC-700 compared to UCNC-600 and UCNC-800; UCNC-700 shows that upon calcination for 3h at 700 °C there is a mix between the  $\text{Sr}_{0.89}\text{Yb}_{10}\text{Er}_{0.01}\text{F}_{2.11}$ -phase and the oxygenized phase.

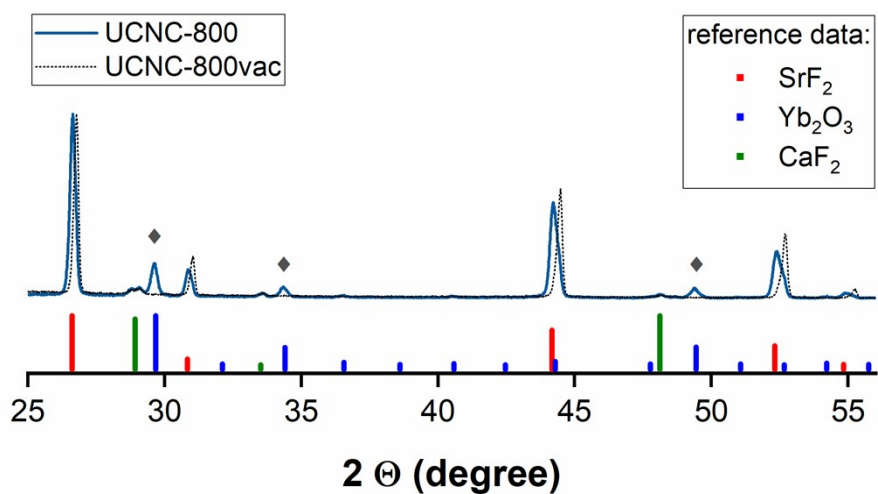

**Figure S13:** XRD-pattern of UCNC-800 calculated in air and UCNC-800vac calcinated in vacuum compared to reference patterns of  $\text{SrF}_2$ ,  $\text{Yb}_2\text{O}_3$  and  $\text{CaF}_2$ ; In addition to the reflections of  $\text{SrF}_2$ , reflections of  $\text{Yb}_2\text{O}_3$  and  $\text{CaF}_2$  are also present in UCNC-800; calcinating at vacuum conditions prevents the formation of oxide

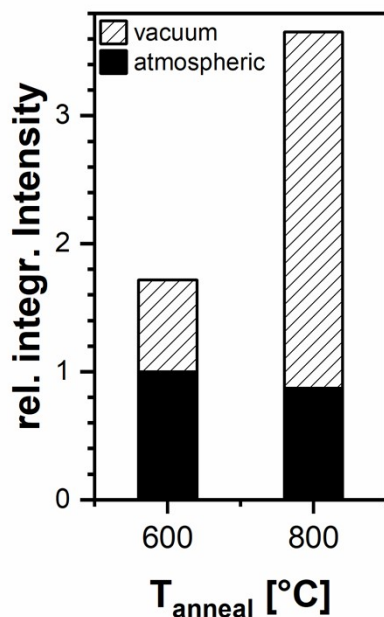

**Figure S14:** Relative integrated UCL intensities of UCNC powders annealed at 600 °C and 800 °C under atmospheric and vacuum conditions. Annealing under atmospheric conditions leads decreasing UCL when annealing above 600 °C due to oxygenation. By vacuum annealing significantly higher UCL can be achieved due to the prevention of the oxygenation of the lanthanide ions.

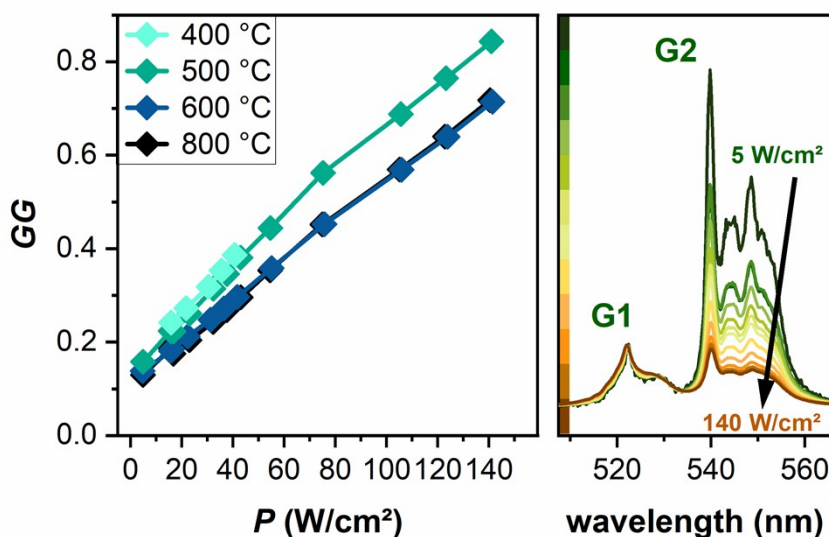

**Figure S15:** (left) *P*-dependent *GG*-Ratio of UCNC powders: UCNC-400, UCNC-500, UCNC-600 and UCNC-800. (left). The *GG*-Ratio is the quotient of the two green emitting transitions  $^2H_{11/2} \rightarrow ^4I_{15/2}$  and  $^4S_{3/2} \rightarrow ^4I_{15/2}$  (G1,G2) with G1 as numerator and G2 as denominator. (right) exemplary evolution of the green emission bands ( $^2H_{11/2}, ^4S_{3/2} \rightarrow ^4I_{15/2}$ ) of UCNC-500.

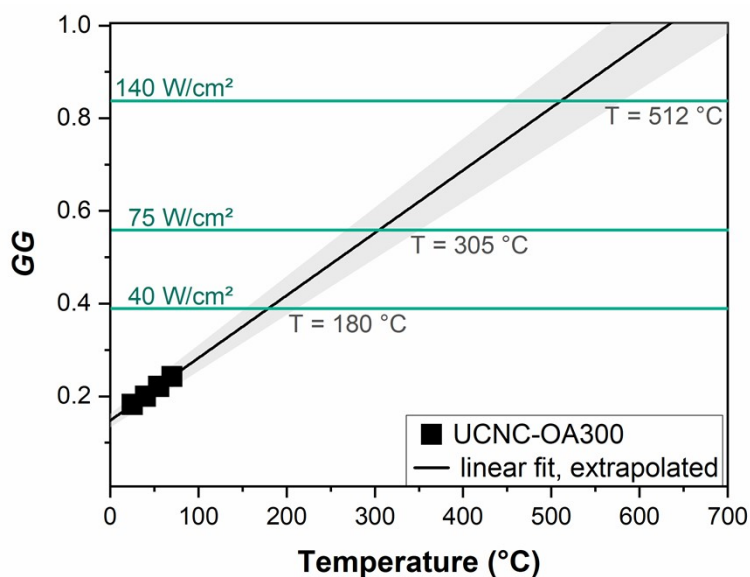

**Figure S16:** Thermometric calibration curve of SrF<sub>2</sub>:Yb<sub>10</sub>Er<sub>1</sub> UCNC dispersion annealed in oleic acid/octadecene at 300°C (OA300); linear fit extrapolated to high GG corresponding to value range determined in S15; exemplary GG values of S15 at various  $P$  represented as horizontal lines, determined temperatures noted

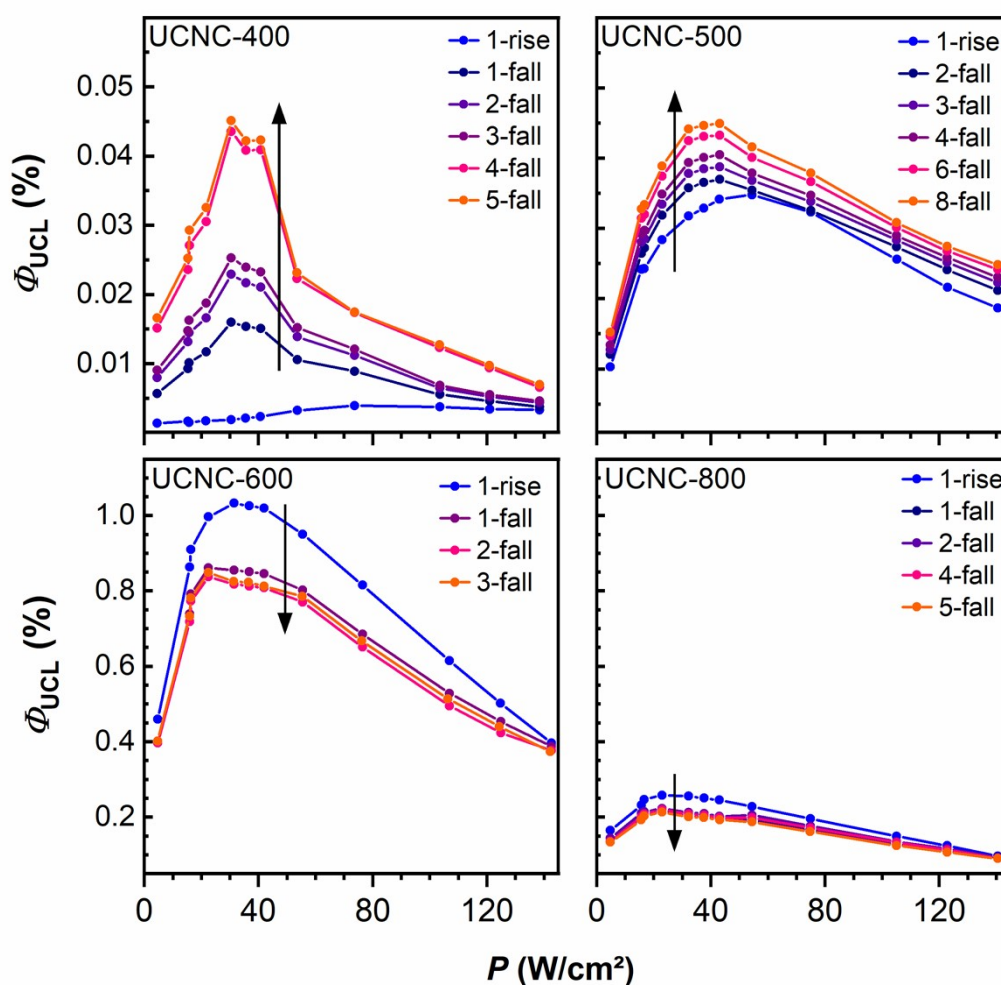

**Figure S17:** Calcination effect observed upon applying multiple laser irradiation cycles in the integrating sphere using a 8W 976 nm laser diode;  $P$ -dependent  $\Phi_{UCL}$  of UCNC-400 (top, left) and UCNC-500 (top, right), UCNC-600 (bottom, left) and UCNC-800 (bottom, right)

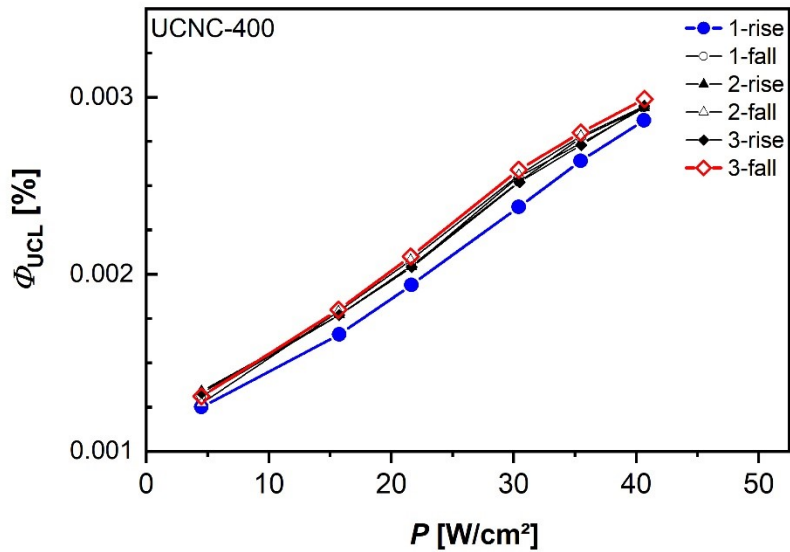

**Figure S18:**  $P$ -dependent  $\Phi_{\text{UCL}}$  of UCNC-400 upon applying three laser irradiation cycles at  $\lambda_{\text{ex}} = 976 \text{ nm}$  in the low  $P$  range (5 to 40  $\text{W}/\text{cm}^2$ ); Noted in the legend as rise and fall, each cycle is divided into increasing  $P$  (closed symbol) and decreasing  $P$  (open symbol); The increasing part of the first cycle is marked in blue, and the decreasing part of the third cycle is marked in red. The data shows the reversibility of  $\Phi_{\text{UC}}$  within the low  $P$  range demonstrating negligible heating effect on the sample, especially when comparing to UCNC-400 in Fig. S18. According to  $GG$ -ratios for this  $P$  range, the powders heat up to temperatures of 180 °C (Fig. S15, Fig. S16).
